# Supplementary material
Source: PubMed Central journal article supplement (PMC5864230)
Supplement: 41396_2017_17_MOESM1_ESM.pdf [file 41396_2017_17_MOESM1_ESM.pdf]

## Supplementary

# The complex resistomes of Paenibacillaceae reflect diverse antibiotic chemical ecologies

Andrew C. Pawlowski, Erin L. Westman, Kalinka Koteva, Nicholas Waglechner, and Gerard D. Wright

### **This file includes:**

Supplementary Material and Methods

Supplementary Figures 1 – 10

Supplementary Tables 1 – 7

### **Additional supplementary information not included in this file:**

Supplementary Dataset 1 - 2

## 16 **Supplementary Materials and Methods**

17 **Antibiotics and reagents.** All reagents were purchased from BioShop (Burlington, Ontario,  
18 Canada) unless otherwise specified. All antibiotics were purchased from Sigma-Aldrich  
19 (Oakville, Ontario, Canada), except for ampicillin and kanamycin (Bioshop) used for plasmid  
20 selection in *E. coli*. Organic solvents were purchased from Fisher Scientific (Ottawa, Ontario,  
21 Canada). Telithromycin was purified from the pharmaceutical formulation Ketek (400 mg,  
22 Sanofi-Aventis US). Two pills were crushed, dissolved in acetonitrile at 40°C and large  
23 molecular weight polymers were removed by passing through an Amicon Ultra-15 10 kDa  
24 centrifugal filter unit and lyophilized.

25 **Growth conditions and genomic DNA isolation.** *Brevibacillus brevis* VM4 (ATCC 35690) was  
26 cultured on tryptic soy agar (TSA; BD biosciences; Mississauga, Ontario, Canada) for two days  
27 at 30°C. The cell pellet from 3 mL culture of *B. brevis* VM4 cultured in Peptone Yeast extract  
28 (PY) media (1% (w/v) peptone, 0.5% yeast extract, 0.5% NaCl, 50 µg mL<sup>-1</sup> MgCl<sub>2</sub>, 30 µg mL<sup>-1</sup>  
29 MnCl<sub>2</sub>, pH 7.2) was used for genomic DNA isolation using the DNeasy Blood & Tissue Kit  
30 (QIAGEN). *E. coli* TOP10 (Invitrogen) was used for cloning experiments, *E. coli* BL21(DE3)  
31 was used for protein overexpression, and *E. coli* BW25113  $\Delta bamB\Delta tolC$  (Cox et al., 2017) was  
32 used for susceptibility determination of *mphJ*. *E. coli* strains were cultured in LB-Lennox  
33 (BioShop) with either 100 µg mL<sup>-1</sup> ampicillin or 50 µg mL<sup>-1</sup> kanamycin for plasmid selection.  
34 *Paenibacillus* sp. LC231 was cultured on TSA for 2 days, and colonies with multiple growth  
35 phenotypes were used for inoculation (Pawlowski et al., 2016).

36 **Antimicrobial susceptibility testing.** Antibiotic susceptibility testing followed the Clinical and  
37 Laboratory Standards Institute guidelines (Clinical and Laboratory Standards Institute, 2012)  
38 for determining the minimal inhibitory concentration (MIC) in microtitre plates (Sarstedt;

39 Germany). For *B. brevis* VM4 and *E. coli*, 2-3 colonies were resuspended in saline and diluted  
40 1:200 into Mueller-Hinton Broth (MHB, BD biosciences). MIC values for *B. brevis* VM4 were  
41 read after stationary incubation at 30°C for 2 days, and MIC values for *E. coli* were read after 24  
42 hours at 37°C.

43 **Cloning of resistance genes and susceptibility testing.** Cloning is summarized in  
44 Supplementary Table 6, which includes details on expression vectors, restriction enzymes, and  
45 oligonucleotides. Phusion polymerase (ThermoFisher) was used to amplify genes from genomic  
46 DNA, digested with Fast Digest enzymes (ThermoFisher), and ligated into vectors using T4  
47 DNA ligase (ThermoFisher). All pET vectors were transformed into *E. coli* BL21(DE3) for MIC  
48 experiments. pGDP4 (Cox et al., 2017) vectors were transformed into *E. coli* TOP10 for MIC  
49 experiments except for MphJ, which was transformed into *E. coli* BW25113  $\Delta bamB\Delta tolC$ . RphC  
50 and RphD were synthesized as gBlocks (IDT) in two parts, codon optimized for *E. coli*. An  
51 internal engineered BamHI site was used to ligate both parts together, then ligated into pET28a  
52 using NdeI/XhoI restriction sites. Susceptibility testing was performed as described above.

53 **Genome sequencing and prediction of resistance genotype.** The *B. brevis* VM4 genome was  
54 sequenced using Roche 454 technology. Genomic DNA was sheared to 1.5 kb using a Covaris  
55 S220 ultrasonicator (Covaris), and used in library preparation according to the XL+ Rapid  
56 Library Preparation Method (454 Life Sciences/Roche). Emulsion PCR and sequencing were  
57 performing according to the manufacturer's instructions for the FLX+ instrument. MIRA version  
58 3.4.9 was used for de novo assembly of the *B. brevis* VM4 genome. Resistance genotype was  
59 predicted using the Comprehensive Antibiotic Resistance Database (CARD;  
60 <https://card.mcmaster.ca/>) v3 (Jia et al., 2017).

61 **Pan-Paenibacillaceae resistance genotype comparison.** Orthologs of 15 experimentally  
62 validated resistance enzymes from *B. brevis* VM4 and *Paenibacillus* sp. LC231 were identified  
63 by querying all homologs curated in the CARD database against the nr protein database using  
64 BLASTp (ncbi-blast-2.2.31+), with the following conditions; -comp\_based\_stats turned off,  
65 txid186822[Organism] (Paenibacillaceae family) as an -entrez\_query -evalue  $1 \times 10^{-75}$ , and -  
66 max\_target\_seqs 350. An ortholog was defined as having at least 50% identity with an alignment  
67 length of at least 90% of the query sequence length. Orthologs were identified in genome  
68 sequences by parsing the GenBank format feature table for accession numbers identified above.  
69 *vanA* vancomycin resistance clusters were identified by querying D-alanine-D-lactate ligases  
70 (*vanA* homologs) in the CARD database against Paenibacillaceae genomes as described above. A  
71 vancomycin resistance cluster was defined as having *vanRS* and *vanHAX*, which were identified  
72 using BLASTx against CARD. The *van* operon of *Brevibacillus* sp. SKDU10 (assembly ID:  
73 GCF\_001645205.1) was found on the ends of two contigs; *vanHAX* was on one, and *vanRS* was  
74 on the other. Pair-wise sequence identity was computed with Clustal Omega percent identity  
75 matrix (Sievers et al., 2011). Genomic context was extracted from GenBank files. Genes from *B.*  
76 *brevis* VM4 were annotated using manual BLASTx searches on the web server and the transfer  
77 annotation function in Geneious v8.1.6.

78 **Phylogenetic reconstruction of Paenibacillaceae rifampin phosphotransferases (Rph).** Rph  
79 sequences identified in the pan-Paenibacillaceae resistance comparison were aligned with  
80 MAFFT using the L-INS-i method (Katoh and Standley, 2013). The alignment was then  
81 weighted using the transitive consistency score function of T-coffee (Chang et al., 2014). A  
82 maximum-likelihood tree was made with RAxML with the GAMMA model of rate

83 heterogeneity and JTT empirical base frequencies (PROTGAMMAAUTO flag) and using rapid  
84 bootstrap analysis on 100 replicates (Stamatakis, 2014).

85 **Co-localization of resistance genes and mobile genetic elements.** Genomic locations of each  
86 resistance gene were identified using efetch, and downloading the identical protein  
87 report (Maglott et al., 2007). The regions 2.5kb, 5kb, and 10kb upstream and downstream of  
88 each resistance gene were individually downloaded directly from GenBank using efetch. Mobile  
89 elements were identified in these regions by parsing GenBank CDS ‘product’ qualifiers for terms  
90 describing mobile genetic elements (Li et al., 2017, Hu et al., 2016, Forsberg et al., 2014);  
91 ‘transposase’, ‘transposon’, ‘conjugative’, ‘integrase’, ‘integron’, ‘recombinase’, ‘conjugal’,  
92 ‘mobilization’, ‘recombination’ and ‘plasmid’. The terms ‘integrase’, ‘recombinase’, and  
93 ‘transposase’ were the most dominant. A resistance gene with nearby mobile genetic elements  
94 were identified as having one or more CDS with one of the terms described above. Plasmid  
95 localization of resistance genes was investigated by searching the ‘source’ feature of each  
96 GenBank file for ‘plasmid\_type’ or ‘plasmid’, which is standard GenBank annotation for a  
97 plasmid ([http://www.insdc.org/files/feature\\_table.html](http://www.insdc.org/files/feature_table.html)). Resistance genes with nearby mobile  
98 elements were then mapped onto the pan-Paenibacillaceae resistance genome comparison (Fig.  
99 3). Mobile genetic elements near *van* operons were identified similarly, but the regions analyzed  
100 for mobile elements were upstream of *vanR* and downstream of the vancomycin resistance gene  
101 on the rightmost border of the cluster.

102 This approach is limited by the fact that most of the genome sequences in this study are  
103 assembled from short reads, and plasmids are therefore difficult to identify. **Since only 42 of the**  
104 **184 genomes were assembled into single chromosomes, two extra steps were taken to investigate**  
105 **whether resistance genes were on plasmids. The size of contigs that contain resistance genes**

106 were extracted from GenBank files, and are summarized in Supplementary Figure 8. Resistance  
107 genes on contigs greater than 500 kb were assumed to not be mobile (Smillie et al., 2010).  
108 Contigs that contain resistance genes and were less than 500 kb were searched (megaBLAST)  
109 against all known RefSeq plasmids. Known bacterial RefSeq plasmids were downloaded from  
110 GenBank using the entrez query 'plasmid' (18,484 plasmids). None of the contigs were similar  
111 to known plasmids, and we did not find any evidence of horizontal transfer of resistance genes  
112 on plasmids.

113 **Pan-*Brevibacillus* secondary metabolism comparison.** AntiSMASH 3.0.5 with default settings  
114 and the `-knownclusterblast` flag was used to predict biosynthetic clusters from downloaded  
115 GenBank files (Weber et al., 2015). Biosynthetic clusters were grouped by sorting all sequences  
116 by length and using an all-against-all BLASTn with the following conditions; `-task blastn`, `-`  
117 `max_hsps 10`, and `-evalue 1 × 10-25`. BLASTn results of homologous biosynthetic clusters can be  
118 split into multiple sub-alignments if small localized regions do not align well. These regions  
119 usually correspond to intergenic or other non-functional regions that are not essential to cluster  
120 function. Therefore, biosynthetic clusters were grouped together if the total length of sub-  
121 alignments (>70% sequence identity) was greater than 60% of the total sequence length.  
122 Groupings were validated manually by verifying genomic context and gene synteny in Geneious  
123 v8.1.6. Biosynthetic clusters linked to a known secondary metabolite were identified in the  
124 literature; gramicidin (Kessler et al., 2004), tyrocidine (Mootz and Marahiel, 1997),  
125 edeine (Westman et al., 2013), basiliskamides (Theodore et al., 2014), petrobactin (Lee et al.,  
126 2007). The presence of resistance genes in biosynthetic clusters were identified by searching the  
127 antiSMASH biosynthetic cluster GenBank files for protein accession numbers of resistance  
128 enzymes identified above.

129 **Macrolide and kanamycin resistance gene expression experiments.** For gene expression  
130 experiments, 2-3 colonies of *B. brevis* VM4 were resuspended in saline to an OD<sub>600</sub> of 0.1, and  
131 200 µL was used to inoculate 20 mL of MHB in a 50 mL Erlenmeyer flask. These cultures were  
132 incubated with shaking (250 rpm) at 30°C for 16 hours, after which ¼ MIC erythromycin (0.063  
133 µg mL<sup>-1</sup>), tylosin (*B. brevis* VM4 0.125 µg mL<sup>-1</sup>, *Paenibacillus* sp. LC231 4 µg mL<sup>-1</sup>), or  
134 pikromycin (*B. brevis* VM4 2 µg mL<sup>-1</sup>, *Paenibacillus* sp. LC231 32 µg mL<sup>-1</sup>) were added and  
135 further incubated with shaking for 2 hours. An equal volume of DMSO was added to the no drug  
136 cultures. *mphI* expression experiments in *Paenibacillus* sp. LC231 were performed identically  
137 with ¼ MIC tylosin (4 µg mL<sup>-1</sup>). After 2 hour incubation, 2 mL of culture were centrifuged at  
138 max speed and the cell pellets were stored at -80°C until use. For RNA isolation, cell pellets  
139 were thawed, resuspended in 100 µL of 20 mg mL<sup>-1</sup> lysozyme (25 mM tris pH 8.5, 1 mM  
140 EDTA) and incubated for 15 min at 37°C. 20 µL of 20 mg mL<sup>-1</sup> proteinase K was added to the  
141 cell mass and vortexed, and then incubated at 45°C for an additional 5 min. Cells were lysed by  
142 the addition of 1 mL TRIzol (ThermoFisher) and repeatedly pipetting up and down. RNA was  
143 isolated by following the manufacturer's instruction for the TRIzol Reagent with the PureLink  
144 RNA mini kit protocol. RNA was eluted with 20 µL RNase-free water. The Maxima first-strand  
145 cDNA synthesis kit with dsDNase (ThermoFisher) was used for cDNA synthesis following the  
146 manufacturer's protocol with the following modifications; 5 µg of input RNA was DNase treated  
147 for 20 minutes at 37 °C and the reaction time at 50 °C was prolonged to 30 min. cDNA was  
148 diluted 5-fold before use in qPCR. **Reactions contained** 10 µL SYBR Select qPCR master mix,  
149 8.2 µL 478 nM primers, 1.8 µL diluted cDNA. Each experiment was performed with biological  
150 triplicates. Gene expression was evaluated with the SYBR Select qPCR master mix  
151 (ThermoFisher) in a Bio-Rad C1000 real-time thermocycler with the following cycling

152 conditions; 50 °C for 2 minutes, 95 °C for 2 minutes, followed by 40 cycles of 95 °C for 30 s and  
153 60 °C for 65 s, and one final extension for 1 minute. *gyrA* was used as an internal standard to  
154 normalize gene expression. qPCR negative controls were samples treated identically, but void of  
155 reverse transcriptase enzyme in the cDNA synthesis step. Oligonucleotide sequences are listed in  
156 Supplementary Table 7. Statistical analysis was performed using an unpaired Students t-test in  
157 GraphPad (<https://www.graphpad.com/quickcalcs>). Gene expression analysis of aminoglycoside  
158 modifying enzymes (*aac(6')-35* and *ant(4')-Ic*) was performed identically, but without the  
159 addition of any antibiotic.

160 ***B. brevis* VM4 growth curves and *rph* expression.** *B. brevis* VM4 does not grow reproducibly  
161 in 96-well plates, and we therefore used Nephelo culture flasks (Pyrex) for growth curve  
162 experiments. 2-3 colonies of *B. brevis* VM4 were resuspended in saline to an OD<sub>600</sub> of 0.1, and  
163 200 µL was used to inoculate 20 mL of MHB in a 50 mL Erlenmeyer flask. These cultures were  
164 incubated with shaking (250 rpm) at 30°C for 16 hours. 500 µL of this culture was used to  
165 inoculate 50 mL of MHB in a 250 mL Nephalo culture flask and incubated with shaking (250  
166 rpm) at 30 °C. Cell growth was monitored by pouring culture into the attached sidearm and  
167 measuring OD<sub>600</sub> (Spectronic 200, ThermoFisher). Rifampin (0.5x, 1x, or 2x MIC) was added at  
168 OD<sub>600</sub> of 0.5 (6 hours). An equal volume of saline was added to the no drug control. All  
169 conditions were performed in duplicate. For *rph* expression analysis a similar experiment was  
170 performed on a culture challenged with 1x MIC rifampin. 2 mL of culture was removed prior to  
171 adding rifampin (pre-rifampin control), 2 hours post-rifampin challenge (lag phase), 5.33 hours  
172 post-rifampin (recovery phase), and 17 hours post-rifampin. RNA was isolated and cDNA  
173 synthesis were carried out as described above. *rphC* and *rphD* are 79% identical and we could  
174 not design primers unique to each gene. Degenerate primers (Supplementary Table 7) were used



175 to simultaneously amplify both *rphC* and *rphD* in the following reaction: 10  $\mu$ L HF buffer, 1  $\mu$ L  
176 10 mM dNTP, 0.5  $\mu$ L Phusion polymerase (ThermoFisher), 400  $\mu$ M each primer, 2  $\mu$ L of cDNA  
177 (first diluted 1:5), and water to 50  $\mu$ L. Cycling conditions used were; 98  $^{\circ}$ C for 3 min, followed  
178 by 30 cycles of 98  $^{\circ}$ C for 20 s, 66  $^{\circ}$ C for 25 s, and 72  $^{\circ}$ C for 30 s, followed by a final extension of  
179 1 min at 72  $^{\circ}$ C. Within the amplified region, *rphD* has a unique BamHI restriction site not found  
180 in *rphC* and this site was used to differentiate between *rphC* and *rphD* expression in the  
181 following reaction; 10  $\mu$ L PCR product, 17  $\mu$ L water, 2  $\mu$ L of FastDigest Green buffer, and 1  $\mu$ L  
182 FastDigest BamHI (ThermoFisher). The expected amplicon size was 396 bp for both *rphC* and  
183 *rphD* and digestion with BamHI would cleave *rphD* into two products (199 bp and 197 bp).  
184 Samples with and without BamHI digestion were run on a 2% agarose gel (FroggaBio). This  
185 experiment was performed with biological duplicates and a negative control where reverse  
186 transcriptase was not added to the cDNA synthesis reaction.

187 **Monitoring rifampin degradation by *B. brevis* VM4.** 2x MIC rifampin was added to 50 mL *B.*  
188 *brevis* VM4 cultures in mid-exponential phase similar to *rph* expression experiments above, and  
189 continued with shaking for an additional 36 hours. *B. brevis* VM4 cultured without rifampin,  
190 MHB with 2x MIC rifampin, and MHB were used as controls. 50 mL of acetonitrile was added  
191 to the culture flasks to lyse cells and extract hydrophobic compounds, including rifampin.  
192 Insoluble debris was removed by centrifuging at 10,000  $\times g$  for 20 minutes. The supernatant was  
193 lyophilized (Labconco) and resuspended in 1 mL water. The sample was centrifuged at 17,000  $\times$   
194  $g$  for 10 minutes resulting in three layers; sediment, liquid layer, and an upper solid lipid layer.  
195 The middle liquid layer was removed, lyophilized, and dissolved in 500  $\mu$ L of 1:1  
196 methanol:water. High resolution electrospray ionization mass spectra were acquired using  
197 Agilent 1290 UPLC separation module and qTOF G6550A mass detector in negative ion mode.

198 Liquid chromatography separation was carried out using Eclipse C18 (3.5  $\mu\text{m}$ , 2.1x100 mm)  
199 column (Agilent Technologies) and the following pump method: at 0 min 95% solvent A (0.1%  
200 v/v formic acid in water), from 1 to 7 min up to 97% solvent B (0.1% v/v of formic acid in  
201 acetonitrile), at a flow rate 0.5 ml/min. Rifampin eluted at 4.79 min and has  $[\text{M-H}]^-$  m/z  
202 821.39745.

203 To identify degradation products of rifampin phosphate, 5  $\mu\text{g mL}^{-1}$  rifampin was added to a *B.*  
204 *brevis* VM4 culture in stationary phase. *B. brevis* VM4 was cultured for 16 hr in liquid MHB, at  
205 which point rifampin was added at 5  $\mu\text{g mL}^{-1}$  and incubated with shaking (250 rpm) for 4 days at  
206 30°C. Samples were removed from the culture after 36 and 96 hours, and added to an equal  
207 volume of cold methanol and stored at -20°C. Control samples that contained only MHB, MHB  
208 and 5  $\mu\text{g mL}^{-1}$  rifampin, and only *B. brevis* VM4 were treated identically. Samples were  
209 centrifuged at 17,000  $\times g$  for 10 min to remove insoluble material. The presence of rifampin was  
210 monitored using HPLC. Samples were analyzed by injecting 50  $\mu\text{L}$  onto an Agilent 1200 Series  
211 LC system (Agilent Technologies). The HPLC conditions are as follows: 95% water for 1  
212 minute, linear gradient from 95% water to 100% acetonitrile from 1 min to 5 min, isocratic 100%  
213 acetonitrile to 5.5 min, linear gradient from 100% acetonitrile to 95% water to 6 min, then  
214 reequilibration at 95% water until 12 min at a flow rate of 1  $\text{mL min}^{-1}$  and using a C18 column  
215 (Waters Xterra RP 18, 5  $\mu\text{m}$ , 4.6 x 150 mm).

216 **Protein overexpression and purification.** pET vectors were transformed into *E. coli*  
217 BL21(DE3) for overexpression, and 1 L cultures were incubated with shaking at 37 °C and 250  
218 rpm until an  $\text{OD}_{600}$  of 0.5-0.6, chilled in an ice bath for 20 minutes, and induced with 1 mM  
219 IPTG for 16 hours at 17 °C. Cells were harvested by centrifuging at 10,000  $\times g$  for 20 minutes,  
220 washed with saline and resuspended in 20 mL buffer A (50 mM HEPES pH 7.5, 150 mM NaCl,

221 5% glycerol, 10 mM imidazole). Cells were lysed with a One-shot Cell Disruptor (Constant  
222 Systems Limited) at 20,000 psi and an additional 15 mL buffer A was added along with 5 mg  
223 bovine pancreas DNase (Sigma) and 2.5 mg of bovine pancreas RNase (Sigma). Cell debris and  
224 insoluble protein were removed by centrifugation at  $48,000 \times g$  for 45 min. Overexpressed  
225 proteins were purified with a 1 mL  $\text{Ni}^{2+}$ -nitrilotriacetic acid column (Qiagen) using a linear  
226 gradient of 95% buffer A to 100% buffer B (50 mM HEPES pH 7.5, 150 mM NaCl, 5% glycerol,  
227 250 mM imidazole) over 20 column volumes. Fractions containing pure purified protein, as  
228 determined by SDS-PAGE, were pooled and desalted into 50 mM HEPES pH 7.5 using a PD-10  
229 desalting column (GE Scientific). Pure enzyme stocks were stored at 4 °C.

230 **Characterization of RphC and RphD reaction products.** The regiospecific phosphorylation of  
231 rifampin by RphC and RphD was determined using mass spectrometry. Each 100  $\mu\text{L}$  reaction  
232 consisted of 5  $\mu\text{g}$  of total enzyme (either RphC, RphD, or 2.5  $\mu\text{g}$  of each in a combined reaction),  
233 0.5 mg/mL rifampin, and Rph Buffer (50 mM HEPES pH 7.5, 40 mM  $\text{NH}_4\text{Cl}$ , 5 mM  $\text{MgCl}_2$  and  
234 2 mM ATP). Reactions were incubated at room temperature for 16 hours, stopped with an equal  
235 volume of cold methanol, and stored at -20 °C. Samples were vortexed, and centrifuged at  
236  $17,000 \times g$  for 10 min to sediment protein. 20  $\mu\text{L}$  of each sample was injected onto an Agilent  
237 1100 Series LC system and a QTRAP LC/MS/MS system (ABSciex). The HPLC conditions  
238 were as follows: isocratic 5% solvent B (0.05% formic acid in acetonitrile), 95% solvent A  
239 (0.05% formic acid in water) over 1 min, followed by a linear gradient to 97% B over 7 min at a  
240 flow rate of 1 mL/min and C18 column (Sunfire, 5  $\mu\text{m}$ ,  $4.6 \times 50$  mm).

241 **Steady-state kinetic characterization of resistance enzymes.** Enzyme reactions were  
242 performed in duplicate, except for MphJ, which was performed in triplicate. All reactions were  
243 initiated with the addition of nucleotide (MphJ, ANT(4'), RphC, RphD) or acetyl-Coenzyme A

244 (acetyl-CoA). All enzyme reactions were performed in 96-well Nunc plates (Thermo Scientific)  
245 using Spectramax Plus384 (Molecular Devices) microtitre plate reader. GraphPad Prism was  
246 used for data analysis.

247 Steady-state kinetics for MphJ were measured using the PK/LDH (pyruvate kinase/lactate  
248 dehydrogenase)-coupled assay (Shakya and Wright, 2010). The phosphorylation of macrolide  
249 antibiotics was monitored by coupling the release of ADP/GDP with PK/LDH, and the oxidation  
250 of NADH was monitored at 340 nm using a SpectraMax plate reader in a 96-well format.  
251 Reaction mixtures contained 50 mM HEPES pH 7.5, 40 mM KCl, 10 mM MgCl<sub>2</sub>, 0.2 mM  
252 NADH, 3.5 mM PEP, 4.8 U PK/LDH, 0.025 mg/mL MphJ. For macrolide dependence  
253 experiments, GTP or ATP were provided at 200 μM and macrolide concentration varied from  
254 3.2 μM – 400 μM. For nucleotide dependence experiments, erythromycin was provided at 400  
255 μM and nucleotide concentration varied from 7.8 μM – 4000 μM. Reactions were incubated at  
256 37°C for 5 min before initiating with nucleotide.

257 Steady-state kinetics for RphC and RphD was performed using the EnzChek Phosphate Assay  
258 Kit (Molecular Probes) in Rph Buffer with a final volume of 100 μL (Stogios et al., 2016,  
259 Spanogiannopoulos et al., 2014, Pawlowski et al., 2016). The rifampin K<sub>m</sub> was determined by  
260 varying the concentration between 0.38 μM and 16 μM and maintaining ATP at 250 μM. The  
261 ATP K<sub>m</sub> was determined by holding the rifampin concentration at 8 μM and varying the ATP  
262 concentration between 3.13 μM and 250 μM.

263 Steady-state kinetics for AAC(6′)-35 was measured by monitoring CoA liberation using DTDP  
264 in a 250 μL reaction at 25 °C containing 25 mM MES pH 6.0, and 1 mM EDTA (Wright and  
265 Ladak, 1997, Pawlowski et al., 2016). The K<sub>m</sub> of acetyl-CoA was performed as follows: 20 μM  
266 kanamycin, 31.25 to 2,000 μM acetyl-CoA and 253 nM AAC(6′)-35. The K<sub>m</sub> of kanamycin was

267 determined as follows: 500  $\mu\text{M}$  acetyl-CoA, 1.25 to 250  $\mu\text{M}$  kanamycin and 253 nM AAC(6')-35.

268 Acetyl-CoA was not saturating when determining the  $K_m$  of kanamycin.

269 Steady-state kinetics for ANT(4')-Ic was measured using the EnzChek pyrophosphate assay

270 (Molecular Probes) in a 100  $\mu\text{L}$  reaction at 25  $^{\circ}\text{C}$  containing 50 mM HEPES pH 7.5, 40 mM

271 KCl, 10 mM  $\text{MgCl}_2$  (Cox et al., 2015). The  $K_m$  of ATP was determined as follows: 20  $\mu\text{M}$

272 kanamycin, 78.13 – 2500  $\mu\text{M}$  ATP, and 245 nM ANT(4')-Ic. The  $K_m$  of kanamycin was

273 determined as follows: 2500  $\mu\text{M}$  ATP, 0.23 – 30  $\mu\text{M}$  kanamycin and 245 nM ANT(4')-Ic.

274 **Supplementary Figures**

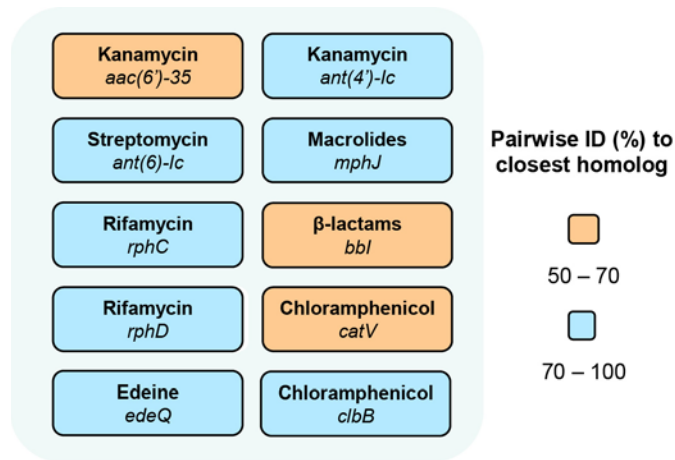

275

276 **Supplementary Figure 1:** The *B. brevis* VM4 resistome. Boxes represent each resistance  
 277 determinant in this study, and the colour fill represents the percent identity to the closest  
 278 experimentally validated homolog.

279

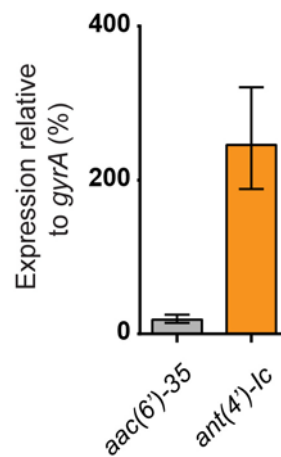

280

281

282 **Supplementary Figure 2:** *B. brevis* VM4 has two kanamycin resistance genes, an *aac(6')* and  
 283 an *ant(4')*, that are expressed. Error bars represent one standard deviation.

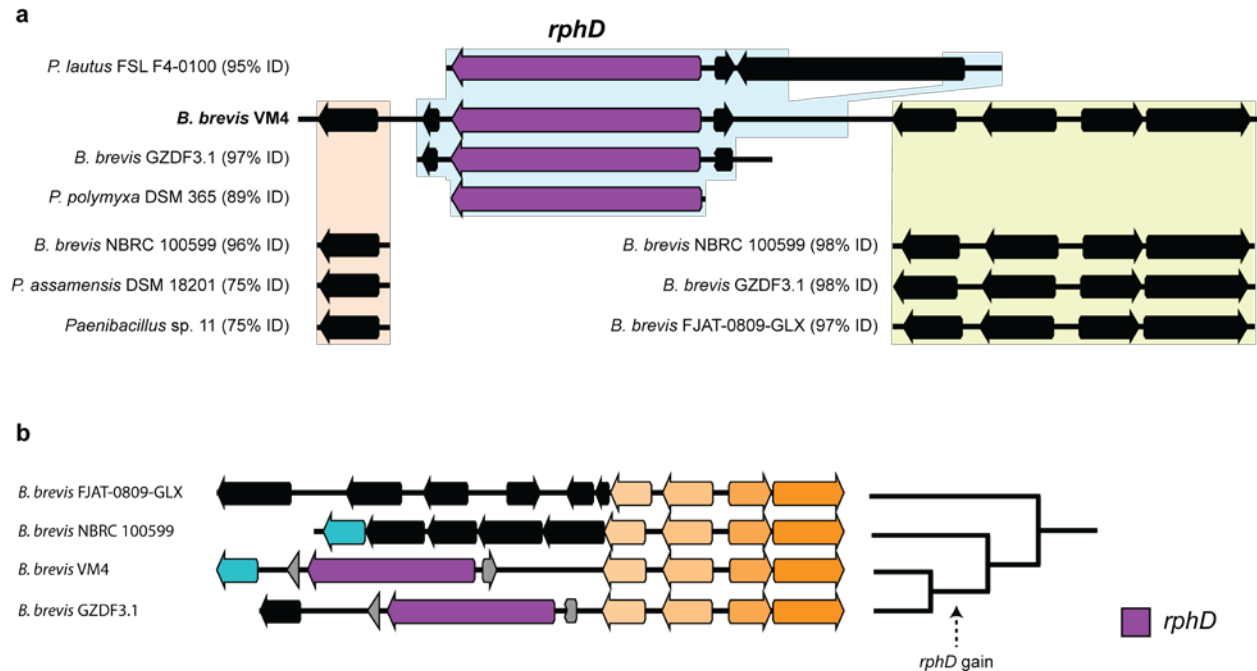

284

285 **Supplementary Figure 3:** *rphD* was horizontally transferred into a *B. brevis* VM4 ancestor. **a**,  
 286 Genetic context of *rphD* and the top 3 BLASTn hits of the adjacent regions. The cluster of genes  
 287 upstream from *rphD* is conserved among related *Brevibacillus*, and *rphD* and the region  
 288 immediately upstream are conserved with *Paenibacillus* isolates and *B. brevis* GZDF3.1, which  
 289 also has two *rph* pseudoparalogs. Percent identity of pair-wise DNA alignments with *B. brevis*  
 290 VM4 are displayed. **b**, *rphD* was acquired by the *B. brevis* GZDF3.1 and *B. brevis* VM4  
 291 ancestor. Conserved gene orthologs are coloured. The GenBank coordinates are; *P. lautus* FSL  
 292 F4-0100, NZ\_MRTF01000005 551266 – 557081; *B. brevis* GZDF3.1, NZ\_LVYG01000001  
 293 653739 – 657453 and 657467 – 661279; *P. polymyxa* DSM 365, NZ\_JMIQ01000010 35305 –  
 294 37966; *Paenibacillus* sp. 11, NZ\_FXAZ01000001 1295778 – 1296531; *P. assamensis* DSM  
 295 18201, NZ\_AULU01000011 191516 – 192256; *B. brevis* NBRC 100599, NC\_012491 3172554 -  
 296 3176406 and 3172543 – 3176420; *B. brevis* FJAT-0809-GLX NZ\_AHKL01000056 32079 –  
 297 35873.

298

299

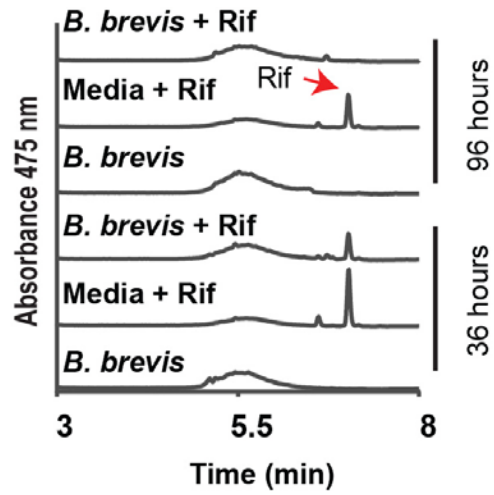

300

301 **Supplementary Figure 4:** HPLC analysis of *B. brevis* VM4 cultured with 5  $\mu\text{g mL}^{-1}$  rifampin  
302 over 4 days.

303

304

305

306

307

308

309

310

311

312

313

314

315

316

317

318

319

320



*Brevibacillus*  
*Paenibacillus*  
*Aneurinibacillus*

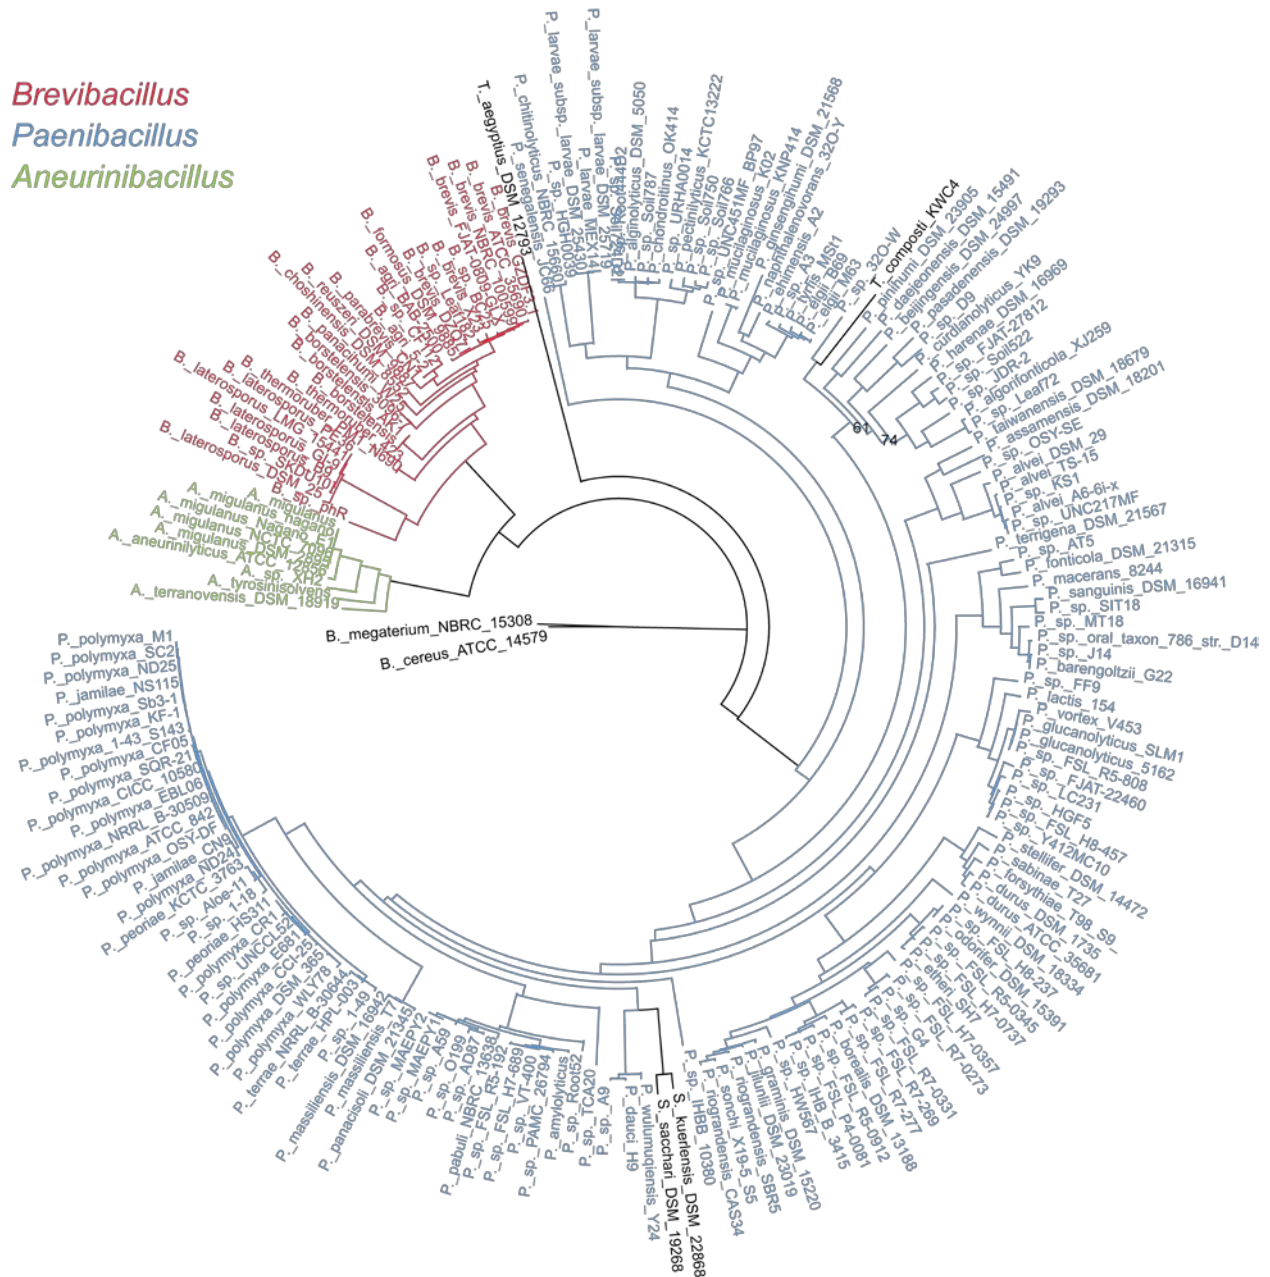

321

322

323 **Supplementary Figure 5:** Phylogenetic tree of 184 Paenibacillaceae isolates. Concatenated  
 324 maximum-likelihood tree using 109 conserved genes, presented as a circular phylogram. The  
 325 coloured segments highlight the three major genera in Paenibacillaceae; Paenibacillus (blue),  
 326 Brevibacillus (red), and Aneurinibacillus (green). Bootstrap values below 90 are displayed at  
 327 branch points, except for crowded branch points near the tips where bootstrap values are not  
 328 displayed.

329

330

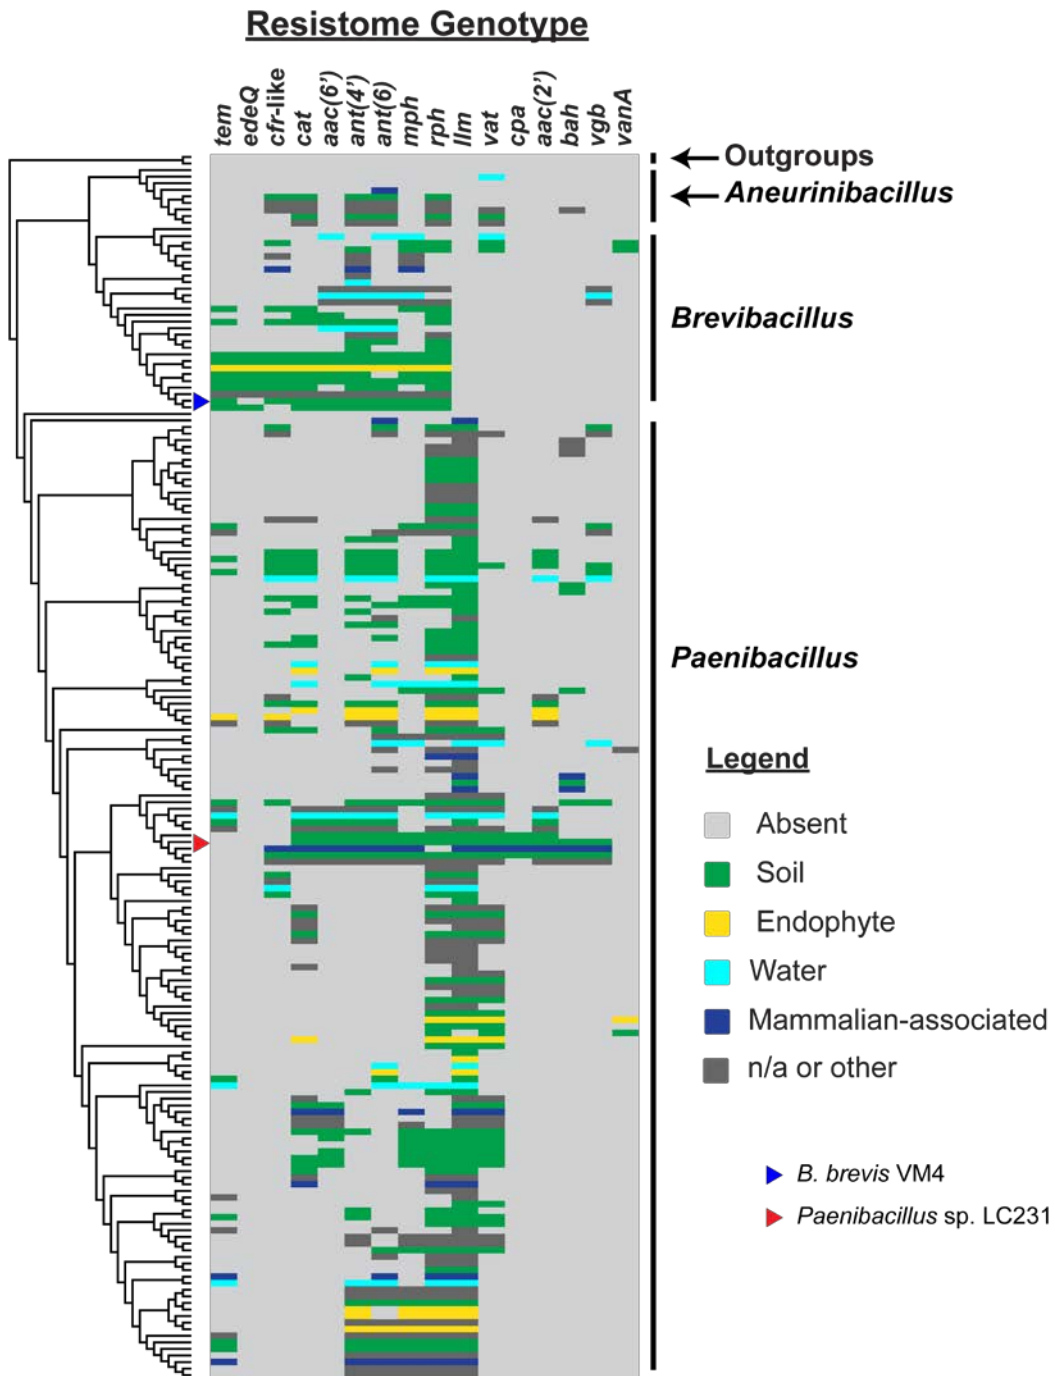

331

332 **Supplementary Figure 6:** Resistome comparisons highlighting the known habitat from which  
 333 strains were isolated. The habitat was generalized from the ‘isolation source’ qualifier in  
 334 GenBank files, if available, or from culture collection databases (e.g. DSM, ATCC) and mapped  
 335 onto the Paenibacillaceae resistome comparison (Fig. 3). The original entries for isolation  
 336 sources can be found in Supplemental Dataset 1. The tree is presented as a dendrogram.

337

338

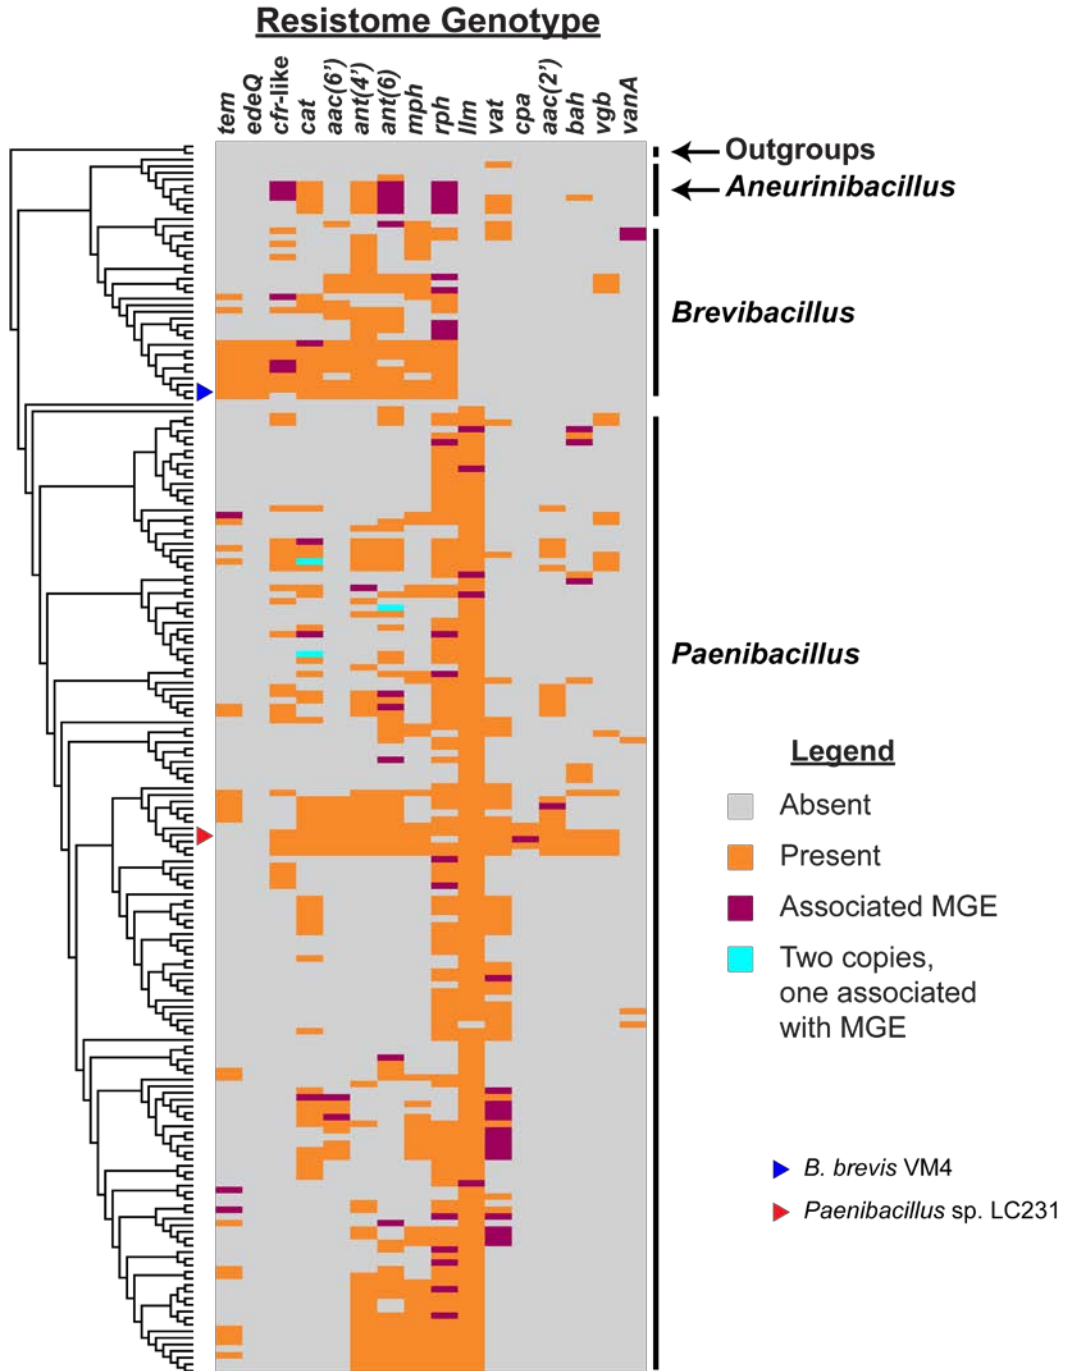

339

340 **Supplementary Figure 7:** Mobile element-associated resistance genes are randomly distributed  
 341 across Paenibacillaceae. Resistance genes with nearby mobile genetic elements were mapped  
 342 onto the Paenibacillaceae resistome comparison (Fig. 3) to visualize horizontal and vertical  
 343 transfer of resistance genes. The tree is presented as a dendrogram.

344

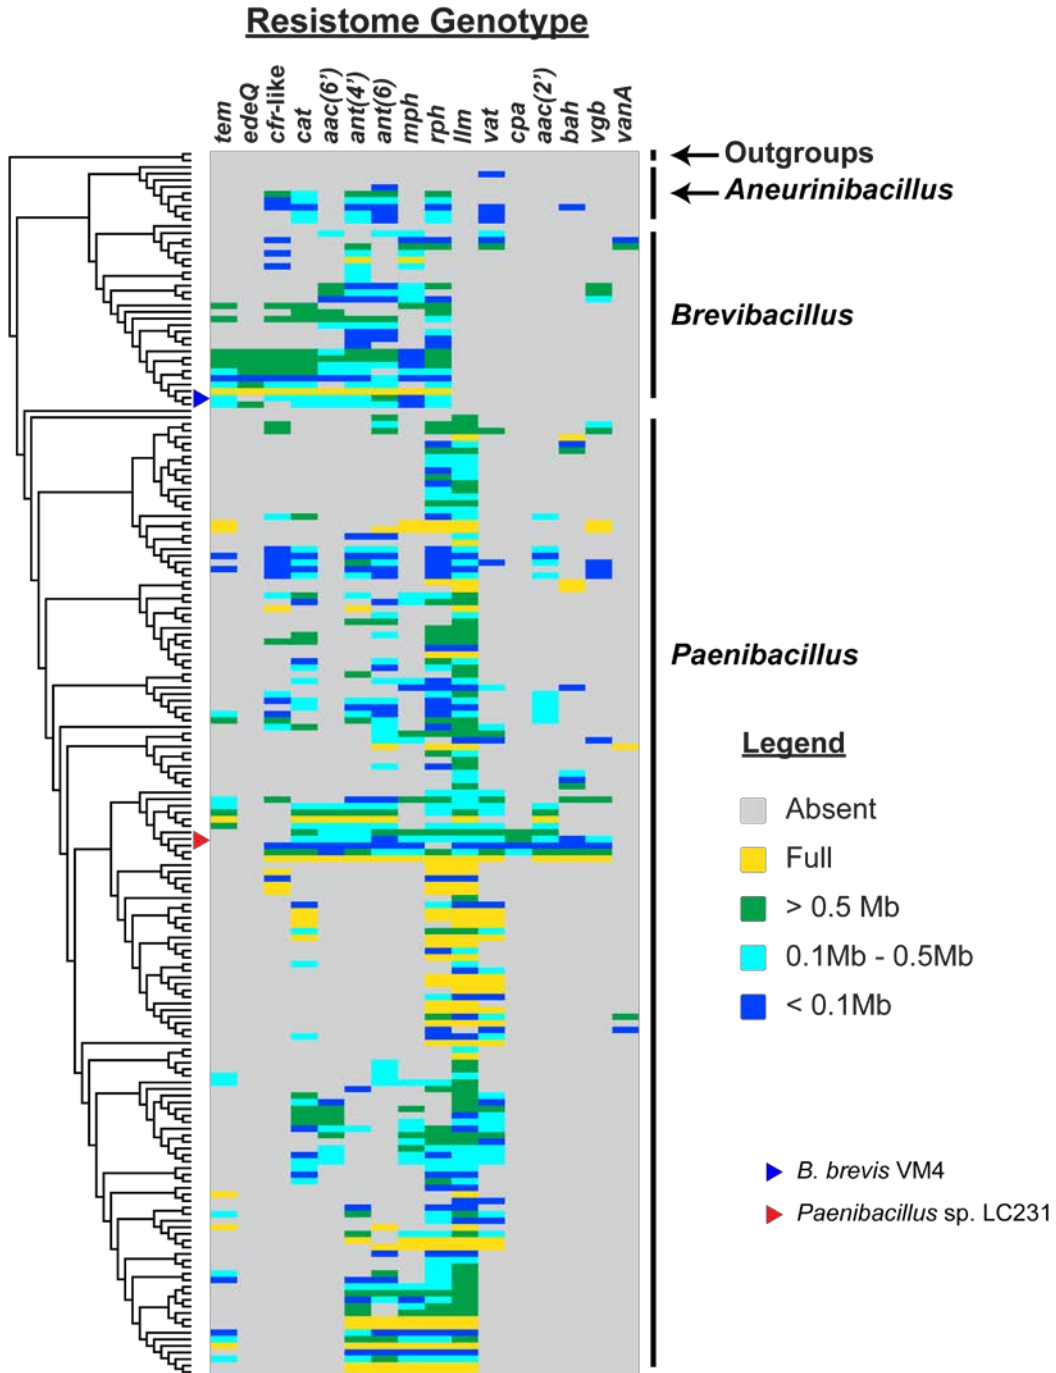

345

346 **Supplementary Figure 8:** Resistance genes are unlikely to be horizontally transferred on  
 347 plasmids. The sequence length of each contig with a resistance gene was identified from  
 348 corresponding GenBank files, and the resistome comparison was coloured to highlight resistance  
 349 genes on; complete chromosomes, contigs greater than 0.5 Mb, between 0.1 Mb and 0.5 Mb, and  
 350 less than 0.1 Mb. This was mapped onto the Paenibacillaceae resistome comparison (Fig. 3). The  
 351 tree is presented as a dendrogram.

352

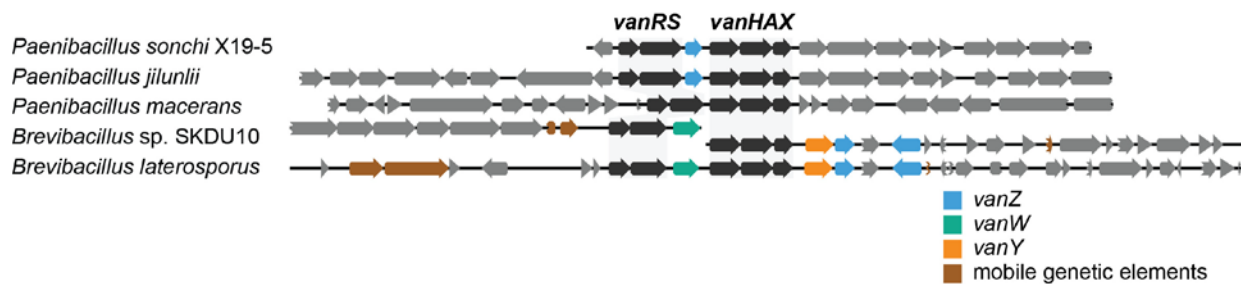

353

354 **Supplementary Figure 9:** Vancomycin operons identified in Paenibacillaceae isolates.  
 355 Predicted vancomycin resistance genes and mobile genetic elements are coloured. The operons  
 356 were found on the following accession numbers; *Paenibacillus sonchi* X19-5  
 357 (NZ\_AJTY01000176), *Paenibacillus jilunlii* (NZ\_LIPY01000123), *Paenibacillus macerans*  
 358 (NZ\_KN125580), *Brevibacillus* sp. SKDU10 *vanRS* (NZ\_LSSO01000215) and *vanHAX*  
 359 (NZ\_LSSO01000140), and *Brevibacillus laterosporus* (NZ\_JNFS01000003).

360

361

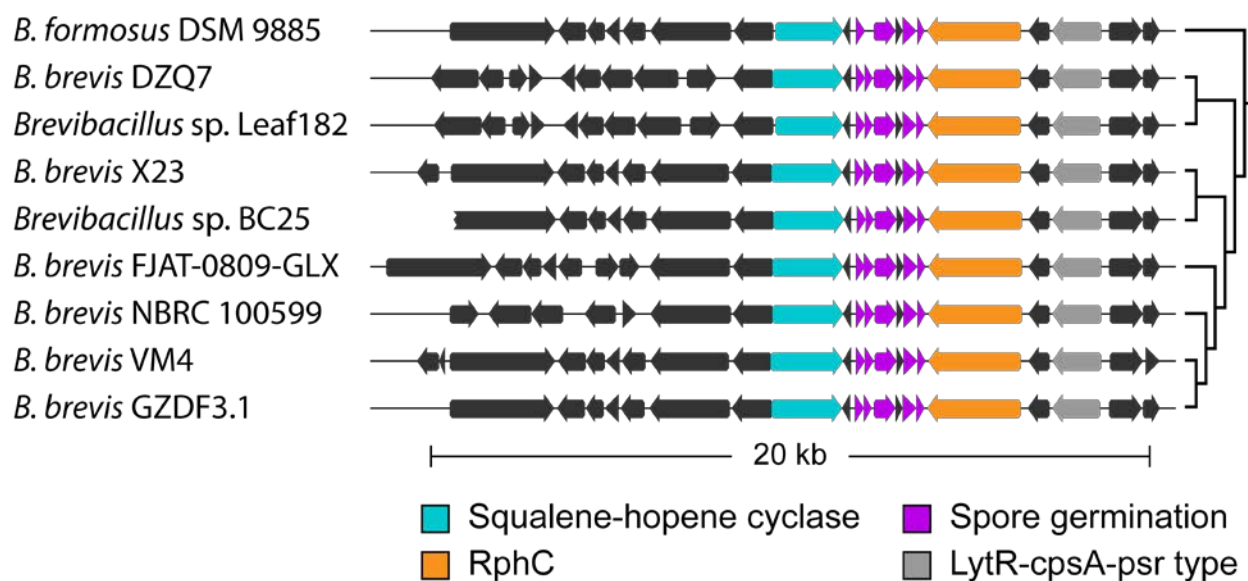

362

363 **Supplementary Figure 10:** RphC is clustered within a polycyclic terpenoid biosynthetic cluster.  
 364 RphC is conserved within terpene group 89, which may produce a hopanoid-like secondary  
 365 metabolite. The *B. brevis* VM4 species tree was extracted from the Paenibacillaceae tree and  
 366 presented as a dendrogram. The predicted terpene cluster from *B. brevis* FJAT-0809-GLX was  
 367 truncated from the left by 5 genes for presentation.

368

369 **Supplementary Tables**370 **Supplementary Table 1:** Quantitative antibiogram of *Brevibacillus brevis* VM4 and CARD  
371 predicted resistance genotype.

| <b>Antibiotic</b>       | <b>MIC (<math>\mu\text{g mL}^{-1}</math>)</b> | <b>CARD prediction</b>                  |
|-------------------------|-----------------------------------------------|-----------------------------------------|
| Ampicillin              | > 256                                         | <i>bbI</i>                              |
| Piperacillin            | 128                                           | <i>bbI</i>                              |
| Piperacillin/taxobactam | 16                                            |                                         |
| Cefotaxime              | < 0.5                                         |                                         |
| Meropenem               | < 0.5                                         |                                         |
| Cephalexin              | 4                                             |                                         |
| Cefotaxime              | < 0.5                                         |                                         |
| Lincomycin              | > 256                                         | <i>clbB</i>                             |
| Clindamycin             | 4                                             | <i>clbB</i>                             |
| Synercid                | 8                                             | <i>clbB</i>                             |
| Kanamycin               | > 512                                         | <i>aac(6')-35</i> and <i>ant(4')-Ic</i> |
| Neomycin                | 32                                            | <i>aac(6')-35</i> and <i>ant(4')-Ic</i> |
| Gentamicin              | 4                                             | <i>aac(6')-35</i> and <i>ant(4')-Ic</i> |
| Ribostamycin            | >512                                          | <i>aac(6')-35</i> and <i>ant(4')-Ic</i> |
| Isepamicin              | 256                                           | <i>aac(6')-35</i> and <i>ant(4')-Ic</i> |
| Paromomycin             | >512                                          | <i>ant(4')-Ic</i>                       |
| Lividomycin             | >256                                          | <i>ant(4')-Ic</i>                       |
| Sisomicin               | <0.5                                          | <i>aac(6')</i>                          |
| Netilmicin              | 2                                             | <i>aac(6')</i>                          |
| Streptomycin            | 32                                            | <i>ant(6)-Ic</i>                        |
| Spectinomycin           | > 256                                         |                                         |
| Fortimicin A            | 2                                             |                                         |
| Mupirocin               | > 100                                         | <i>ileRS</i>                            |
| Chloramphenicol         | 8                                             | <i>catV</i> , <i>clbB</i>               |
| Apramycin               | 4                                             |                                         |
| Fosfomycin              | 2                                             |                                         |
| Vancomycin              | 2                                             |                                         |
| Teicoplanin             | < 0.5                                         |                                         |
| Tetracycline            | 2                                             |                                         |
| Tigecycline             | < 0.5                                         |                                         |
| Minocycline             | < 0.5                                         |                                         |
| Ciprofloxacin           | < 0.5                                         |                                         |
| Erythromycin            | 0.25                                          | <i>mphJ</i>                             |
| Telithromycin           | < 0.5                                         | <i>mphJ</i>                             |
| Tylosin                 | 0.5                                           | <i>mphJ</i>                             |
| Pikromycin              | 8                                             | <i>mphJ</i>                             |
| Linezolid               | < 0.5                                         | <i>clbB</i>                             |
| Novobiocin              | < 0.5                                         |                                         |
| Rifampin                | 0.063                                         | <i>rphC</i> and <i>rphD</i>             |
| Rifamycin SV            | 0.125                                         | <i>rphC</i> and <i>rphD</i>             |

372

373

374 **Supplementary Table 2:** Pair-wise comparison of antibiotic resistance enzymes with their closest  
 375 ortholog.

| <b>Resistance Enzyme</b> | <b>Closest Relative (% ID)</b> | <b>Host</b>                             |
|--------------------------|--------------------------------|-----------------------------------------|
| ANT(4')-Ic               | ANT(4')-Ia (71%)               | <i>Bacillus clausii</i>                 |
| AAC(6')-35               | AAC(6')-34 (54%)               | <i>Paenibacillus</i> sp. LC231          |
| ANT(6)-Ic                | Aadk (72%)                     | <i>Bacillus subtilis</i> 168            |
| RphC                     | RphB (80%)                     | <i>Paenibacillus</i> sp. LC231          |
| RphD                     | RphB (78%)                     | <i>Paenibacillus</i> sp. LC231          |
| BbI                      | BcI (60%)                      | <i>Bacillus cereus</i>                  |
| MphJ                     | MphI (51%)                     | <i>Paenibacillus</i> sp. LC231          |
| CatV                     | CatU (60%)                     | <i>Paenibacillus</i> sp. LC231          |
| ClbB                     | ClbB (100%)                    | <i>Brevibacillus brevis</i> NBRC 100599 |

376

377 **Supplementary Table 3:** Pair-wise comparison of antibiotic resistance enzymes with their closest  
 378 orthologs mobilized in Gram-positive pathogens.

| <b>Resistance Enzyme</b> | <b>Closest Relative (% ID)</b> | <b>Host</b>                    |
|--------------------------|--------------------------------|--------------------------------|
| ANT(4')-Ic               | ANT(4')-Ib (49%)               | <i>Staphylococcus aureus</i>   |
| AAC(6')-35               | AAC(6')-Ie-APH(2'')-Ia (45%)   | <i>Staphylococcus aureus</i>   |
| ANT(6)-Ic                | Aad(6)                         | <i>Enterococcus faecium</i>    |
| RphC                     | n/a                            |                                |
| RphD                     | n/a                            |                                |
| BbI                      | BlaZ (38%)                     | <i>Staphylococcus aureus</i>   |
| MphJ                     | MphC (41%)                     | <i>Staphylococcus aureus</i>   |
| CatV                     | CatQ (57%)                     | <i>Clostridium perfringens</i> |
| ClbB                     | CfrC (60%)                     | <i>Clostridium botulinum</i>   |

379

380 **Supplementary Table 4:** Pair-wise comparison of antibiotic resistance enzymes with their closest  
 381 orthologs mobilized in Gram-negative pathogens.

| <b>Resistance Enzyme</b> | <b>Closest Relative (% ID)</b> | <b>Host</b>                                                                  |
|--------------------------|--------------------------------|------------------------------------------------------------------------------|
| ANT(4')-Ic               | ANT(3'')-IIb (38%)             | <i>Acinetobacter</i> spp.                                                    |
| AAC(6')-35               | AAC(6')-Ip (41%)               | <i>Escherichia coli</i><br><i>Campylobacter fetus</i> subsp.<br><i>fetus</i> |
| ANT(6)-Ic                | ANT(6)-Ib (55%)                |                                                                              |
| RphC                     | n/a                            |                                                                              |
| RphD                     | n/a                            |                                                                              |
| BbI                      | CTX-M-121 (48%)                | <i>Escherichia coli</i>                                                      |
| MphJ                     | MphB (42%)                     | <i>Escherichia coli</i>                                                      |
| CatV                     | Cat (48%)                      | <i>Campylobacter coli</i>                                                    |
| ClbB                     | n/a                            |                                                                              |

382

383



384 **Supplementary Table 5:** Kinetic constants of resistance enzymes identified in this study.

| Enzyme     | Substrate               | $K_m$ ( $\mu\text{M}$ ) | $k_{cat}$ ( $\text{s}^{-1}$ ) | $K_i$ ( $\mu\text{M}$ ) <sup>a</sup> | $k_{cat}/K_m(\text{s}^{-1}\text{M}^{-1})$ |
|------------|-------------------------|-------------------------|-------------------------------|--------------------------------------|-------------------------------------------|
| ANT(4')-Ic | Kanamycin               | $0.56 \pm 0.08$         | $0.020 \pm 0.001$             |                                      | $3.5 \times 10^4$                         |
|            | ATP                     | $637 \pm 66$            | $0.022 \pm 0.001$             |                                      | $3.5 \times 10^1$                         |
| AAC(6')-35 | Kanamycin               | $12 \pm 8$              | -                             | $12 \pm 9$                           | -                                         |
|            | Acetyl-CoA <sup>b</sup> | $690 \pm 90$            | $0.18 \pm 0.01$               |                                      | $2.6 \times 10^2$                         |
| RphC       | Rifampin                | $1.7 \pm 0.6$           | $0.091 \pm 0.016$             | $16 \pm 7$                           | $4.9 \times 10^4$                         |
|            | ATP                     | $19 \pm 2$              | $0.057 \pm 0.002$             |                                      | $3.0 \times 10^3$                         |
| RphD       | Rifampin                | $1.3 \pm 0.4$           | $0.13 \pm 0.02$               | $23 \pm 11$                          | $1.0 \times 10^5$                         |
|            | ATP                     | $24 \pm 3$              | $0.089 \pm 0.003$             |                                      | $3.9 \times 10^3$                         |
| MphJ       | Erythromycin            | $8.5 \pm 1.2$           | $0.37 \pm 0.01$               |                                      | $4.3 \times 10^4$                         |
|            | Clarithromycin          | $17 \pm 3$              | $0.34 \pm 0.02$               |                                      | $2.0 \times 10^4$                         |
|            | Telithromycin           | $16 \pm 1$              | $0.68 \pm 0.01$               |                                      | $4.2 \times 10^4$                         |
|            | Azithromycin            | $3.7 \pm 0.7$           | $0.23 \pm 0.01$               |                                      | $6.1 \times 10^4$                         |
|            | Tylosin                 | $110 \pm 30$            | $0.56 \pm 0.06$               |                                      | $5.0 \times 10^3$                         |
|            | ATP                     | $1800 \pm 860$          | $0.04 \pm 0.01$               |                                      | $2.2 \times 10^1$                         |
|            | GTP                     | $20 \pm 3$              | $0.39 \pm 0.02$               |                                      | $1.9 \times 10^4$                         |

385 a -  $K_i$  reflects substrate inhibition

386 b - The highest concentration of Acetyl-CoA used for  $K_m$  determination was  $2000 \mu\text{M}$ , and therefore was  
387 not at saturation.

388

389 **Supplementary Table 6:** Oligonucleotides used for resistance gene cloning.

| Gene              | Vector                                                              | Primer Direction | Restriction Site | Sequence                             |
|-------------------|---------------------------------------------------------------------|------------------|------------------|--------------------------------------|
| <i>catV</i>       | pET28a                                                              | Forward          | <i>Nde</i> I     | GGGCCCGCCATATGAAATTCAGCGAATCGATCTAG  |
|                   |                                                                     | Reverse          | <i>Hind</i> III  | AAGGGGCCAAGCTTTCACCTCGACACCTAACCATTC |
| <i>mphJ</i>       | pET28a                                                              | Forward          | <i>Nde</i> I     | GGGCCCGCATATGTCAAAAAACAATGTAGAGCAC   |
|                   |                                                                     | Reverse          | <i>Hind</i> III  | GGCGGGAAAAGCTTCTAGGAAGTGATCTCTTTGCC  |
| <i>ant(6)-Ic</i>  | pGDP4                                                               | Forward          | <i>Nde</i> I     | AAACCCCATATGGTGGCTTTGAGAACGG         |
|                   |                                                                     | Reverse          | <i>Xho</i> I     | AAAGGGCTCGAGTCATTTCCACGAATGGTAG      |
| <i>ant(4')-Ic</i> | pGDP4 (MIC experiments)<br>pET28a (Overexpression and purification) | Forward          | <i>Nde</i> I     | AAAGGGAACATATGAACATGAATGGACCTG       |
|                   |                                                                     | Reverse          | <i>Xho</i> I     | CCCACCCTCGAGTTAAAAAGGAATTCGCTCTG     |
| <i>aac(6')-35</i> | pGDP4 (MIC experiments)<br>pET28a (Overexpression and purification) | Forward          | <i>Nde</i> I     | TGTTTACATATGATTTATGCTGGTGATCTTACC    |
|                   |                                                                     | Reverse          | <i>Xho</i> I     | AAATTTCTCGAGTTAATCAGCAGGAGCAATCCATTC |
| <i>clbB</i>       | pGDP4                                                               | Forward          | <i>Nde</i> I     | AAACGCCATATGAAACTAACCTCGAAATATGAAAC  |
|                   |                                                                     | Reverse          | <i>Xho</i> I     | CGAAATCTCGAGTTATTCAGAACGGTATAGCTGGC  |
| <i>bbI</i>        | pGDP4                                                               | Forward          | <i>Bam</i> HI    | ATCCTGGGATCCATGAAAGTTTACACATCGAGAC   |
|                   |                                                                     | Reverse          | <i>Xho</i> I     | TTGGTCTCGAGTTACGGTTTTGCAGCCGTC       |

390

391

392

393

394



395 **Supplementary Table 7: Oligonucleotides used for qPCR.**

| Gene                                     | Organism                       | Direction | Sequence                 |
|------------------------------------------|--------------------------------|-----------|--------------------------|
| <i>mphJ</i>                              | <i>B. brevis</i> VM4           | Forward   | ACGGAATCCTGGTAGACCCC     |
|                                          |                                | Reverse   | CCAATCCGGTACTTCGACACG    |
| <i>ant(4')-Ic</i>                        | <i>B. brevis</i> VM4           | Forward   | CCTGCCAAGAAATTGCTGCG     |
|                                          |                                | Reverse   | CACATTCACTTCCGCCTTC      |
| <i>aac(6')-35</i>                        | <i>B. brevis</i> VM4           | Forward   | AGATGACGGTGAAACCCGC      |
|                                          |                                | Reverse   | GGAGGATGGCTGTAACGAGC     |
| <i>gyrA</i>                              | <i>B. brevis</i> VM4           | Forward   | TATCGTCAGTCGGGCTTTGC     |
|                                          |                                | Reverse   | CTTGGGCCATACGTACCATCG    |
| <i>rphC</i> and <i>rphD</i> (degenerate) | <i>B. brevis</i> VM4           | Forward   | ATTTTACAACCTGGMACGCATYGG |
|                                          |                                | Reverse   | ATCKCCMCGCTCYATGATGG     |
| <i>gyrA</i>                              | <i>Paenibacillus</i> sp. LC231 | Forward   | CCGCTTCAGGCTCATCGC       |
|                                          |                                | Reverse   | ACCGGTTGTGGCACTTAAGG     |
| <i>mphI</i>                              | <i>Paenibacillus</i> sp. LC231 | Forward   | CCGGAGCTCATCGCCTATCC     |
|                                          |                                | Reverse   | ACCTCTGGGGACTCTTTACCC    |

396

397

398 **References**

- 399 Chang JM, Di Tommaso P, Notredame C. (2014). TCS: a new multiple sequence alignment reliability  
400 measure to estimate alignment accuracy and improve phylogenetic tree reconstruction. *Mol Biol*  
401 *Evol* **31**: 1625-1637.
- 402 Clinical and Laboratory Standards Institute 2012. Methods for dilution: antimicrobial susceptibility  
403 testing of bacteria that grow aerobically. Wayne, PA, USA: CLSI.
- 404 Cox G, Sieron A, King AM, De Pascale G, Pawlowski AC, Koteva K, et al. (2017). A Common Platform for  
405 Antibiotic Dereplication and Adjuvant Discovery. *Cell Chem Biol* **24**: 98-109.
- 406 Cox G, Stogios PJ, Savchenko A, Wright GD. (2015). Structural and molecular basis for resistance to  
407 aminoglycoside antibiotics by the adenylyltransferase ANT(2'')-Ia. *MBio* **6**.
- 408 Forsberg KJ, Patel S, Gibson MK, Lauber CL, Knight R, Fierer N, et al. (2014). Bacterial phylogeny  
409 structures soil resistomes across habitats. *Nature* **509**: 612-6.
- 410 Hu Y, Yang X, Li J, Lv N, Liu F, Wu J, et al. (2016). The Bacterial Mobile Resistome Transfer Network  
411 Connecting the Animal and Human Microbiomes. *Appl Environ Microbiol* **82**: 6672-6681.
- 412 Jia B, Raphenya AR, Alcock B, Waglechner N, Guo P, Tsang KK, et al. (2017). CARD 2017: expansion and  
413 model-centric curation of the comprehensive antibiotic resistance database. *Nucleic Acids Res*  
414 **45**: D566-d573.
- 415 Katoh K, Standley DM. (2013). MAFFT multiple sequence alignment software version 7: improvements in  
416 performance and usability. *Mol Biol Evol* **30**: 772-780.
- 417 Kessler N, Schuhmann H, Morneweg S, Linne U, Marahiel MA. (2004). The linear pentadecapeptide  
418 gramicidin is assembled by four multimodular nonribosomal peptide synthetases that comprise  
419 16 modules with 56 catalytic domains. *J Biol Chem* **279**: 7413-9.
- 420 Lee JY, Janes BK, Passalacqua KD, Pflieger BF, Bergman NH, Liu H, et al. (2007). Biosynthetic analysis of  
421 the petrobactin siderophore pathway from *Bacillus anthracis*. *J Bacteriol* **189**: 1698-710.
- 422 Li LG, Xia Y, Zhang T. (2017). Co-occurrence of antibiotic and metal resistance genes revealed in  
423 complete genome collection. *ISME J* **11**: 651-662.
- 424 Maglott D, Ostell J, Pruitt KD, Tatusova T. (2007). Entrez Gene: gene-centered information at NCBI.  
425 *Nucleic Acids Res* **35**: D26-31.
- 426 Mootz HD, Marahiel MA. (1997). The tyrocidine biosynthesis operon of *Bacillus brevis*: complete  
427 nucleotide sequence and biochemical characterization of functional internal adenylation  
428 domains. *J Bacteriol* **179**: 6843-50.
- 429 Pawlowski AC, Wang W, Koteva K, Barton HA, Mearns AG, Wright GD. (2016). A diverse intrinsic  
430 antibiotic resistome from a cave bacterium. *Nat Commun* **7**: 13803.
- 431 Shakya T, Wright GD. (2010). Nucleotide selectivity of antibiotic kinases. *Antimicrob Agents Chemother*  
432 **54**: 1909-1913.
- 433 Sievers F, Wilm A, Dineen D, Gibson TJ, Karplus K, Li W, et al. (2011). Fast, scalable generation of high-  
434 quality protein multiple sequence alignments using Clustal Omega. *Mol Syst Biol* **7**: 539.
- 435 Smillie C, Garcillan-Barcia MP, Francia MV, Rocha EP, De La Cruz F. (2010). Mobility of plasmids.  
436 *Microbiol Mol Biol Rev* **74**: 434-52.
- 437 Spanogiannopoulos P, Waglechner N, Koteva K, Wright GD. (2014). A rifamycin inactivating  
438 phosphotransferase family shared by environmental and pathogenic bacteria. *Proc Natl Acad Sci*  
439 *U S A* **111**: 7102-7.
- 440 Stamatakis A. (2014). RAxML version 8: a tool for phylogenetic analysis and post-analysis of large  
441 phylogenies. *Bioinformatics* **30**: 1312-1313.
- 442 Stogios PJ, Cox G, Spanogiannopoulos P, Pillon MC, Waglechner N, Skarina T, et al. (2016). Rifampin  
443 phosphotransferase is an unusual antibiotic resistance kinase. *Nat Commun* **7**: 11343.

444 Theodore CM, Stamps BW, King JB, Price LS, Powell DR, Stevenson BS, et al. (2014). Genomic and  
445 metabolomic insights into the natural product biosynthetic diversity of a feral-hog-associated  
446 *Brevibacillus laterosporus* strain. *PLoS One* **9**: e90124.

447 Weber T, Blin K, Duddela S, Krug D, Kim HU, Bruccoleri R, et al. (2015). antiSMASH 3.0-a comprehensive  
448 resource for the genome mining of biosynthetic gene clusters. *Nucleic Acids Res* **43**: W237-43.

449 Westman EL, Yan M, Waglechner N, Koteva K, Wright GD. (2013). Self resistance to the atypical cationic  
450 antimicrobial peptide edeine of *Brevibacillus brevis* Vm4 by the N-acetyltransferase EdeQ. *Chem*  
451 *Biol* **20**: 983-90.

452 Wright GD, Ladak P. (1997). Overexpression and characterization of the chromosomal aminoglycoside  
453 6'-N-acetyltransferase from *Enterococcus faecium*. *Antimicrob Agents Chemother* **41**: 956-60.

454
